# Supplementary material for: Comprehensive behavioral phenotyping of calpastatin-knockout mice
Source: PubMed Central journal article supplement (PMC2561015; doi:10.1186/1756-6606-1-7), 2008-09-15

**A**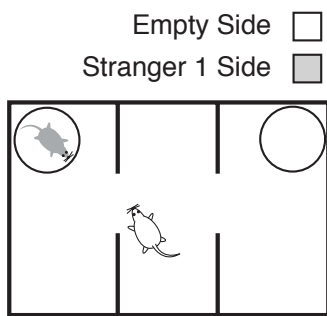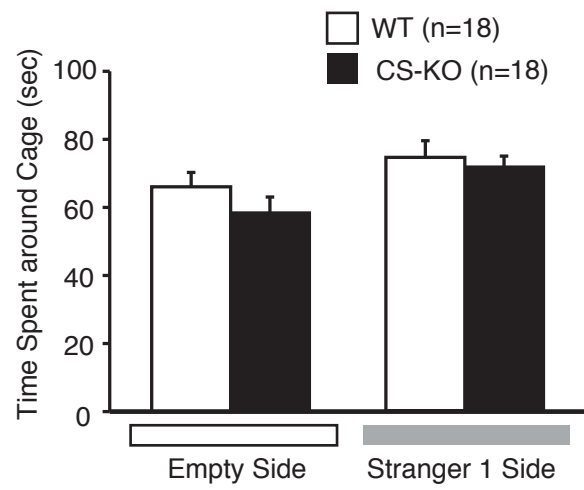**B**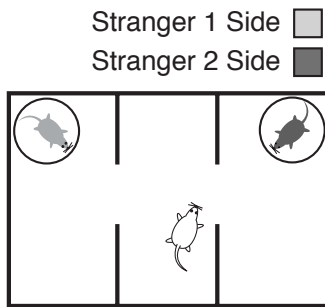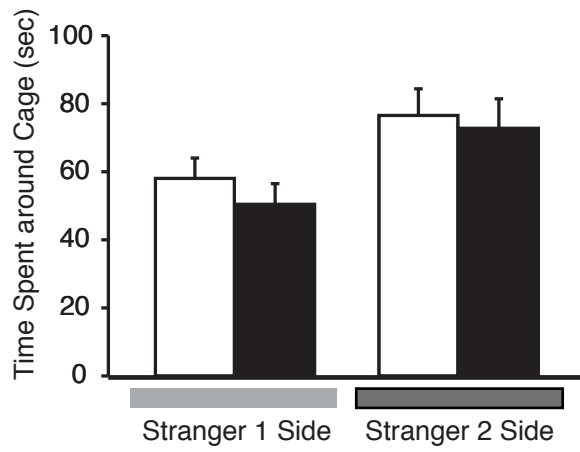

Supplement: 1756-6606-1-7-S1.pdf [file 1756-6606-1-7-S1.pdf]
