# Supplementary figures and images for: Comprehensive behavioral phenotyping of calpastatin-knockout mice
Source: Springer Nature journal article supplement (doi:10.1186/1756-6606-1-7), 2008-01-01

**A**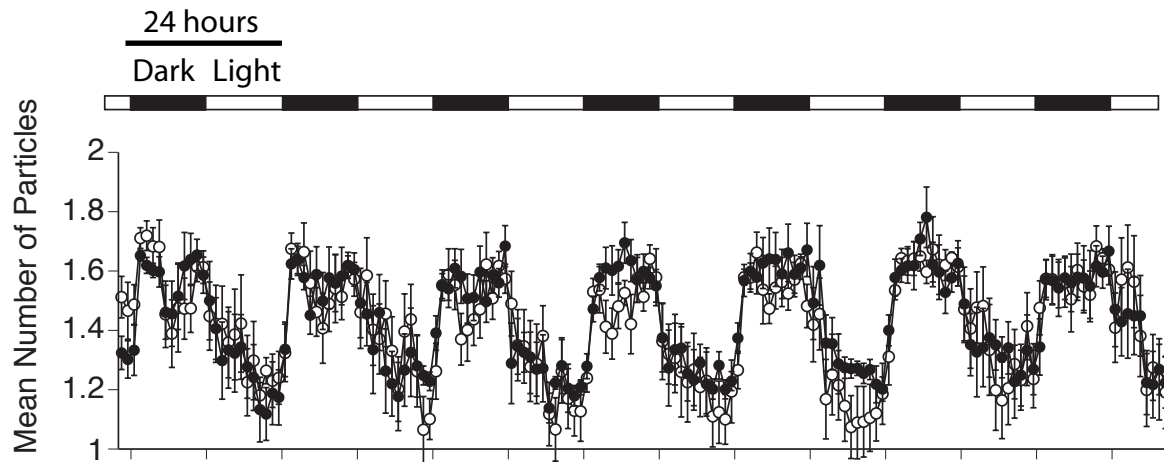**B**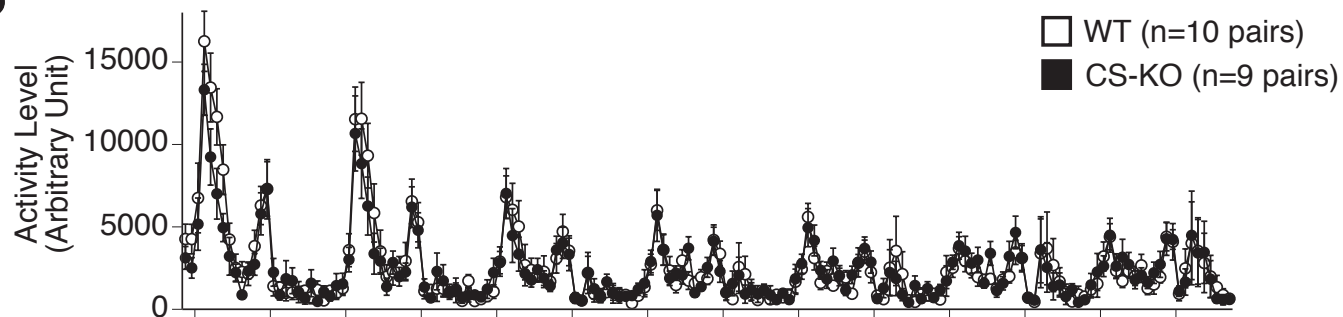

Supplement: Additional file 2 [file 1756-6606-1-7-s2.pdf]

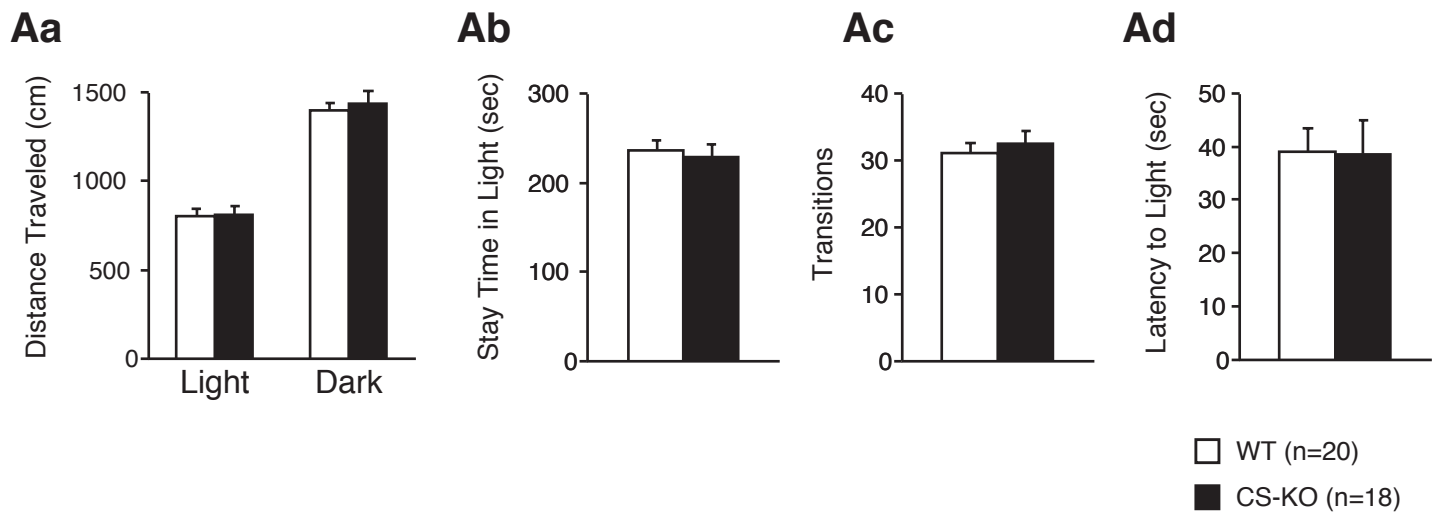

Supplement: Additional file 3 [file 1756-6606-1-7-s3.pdf]

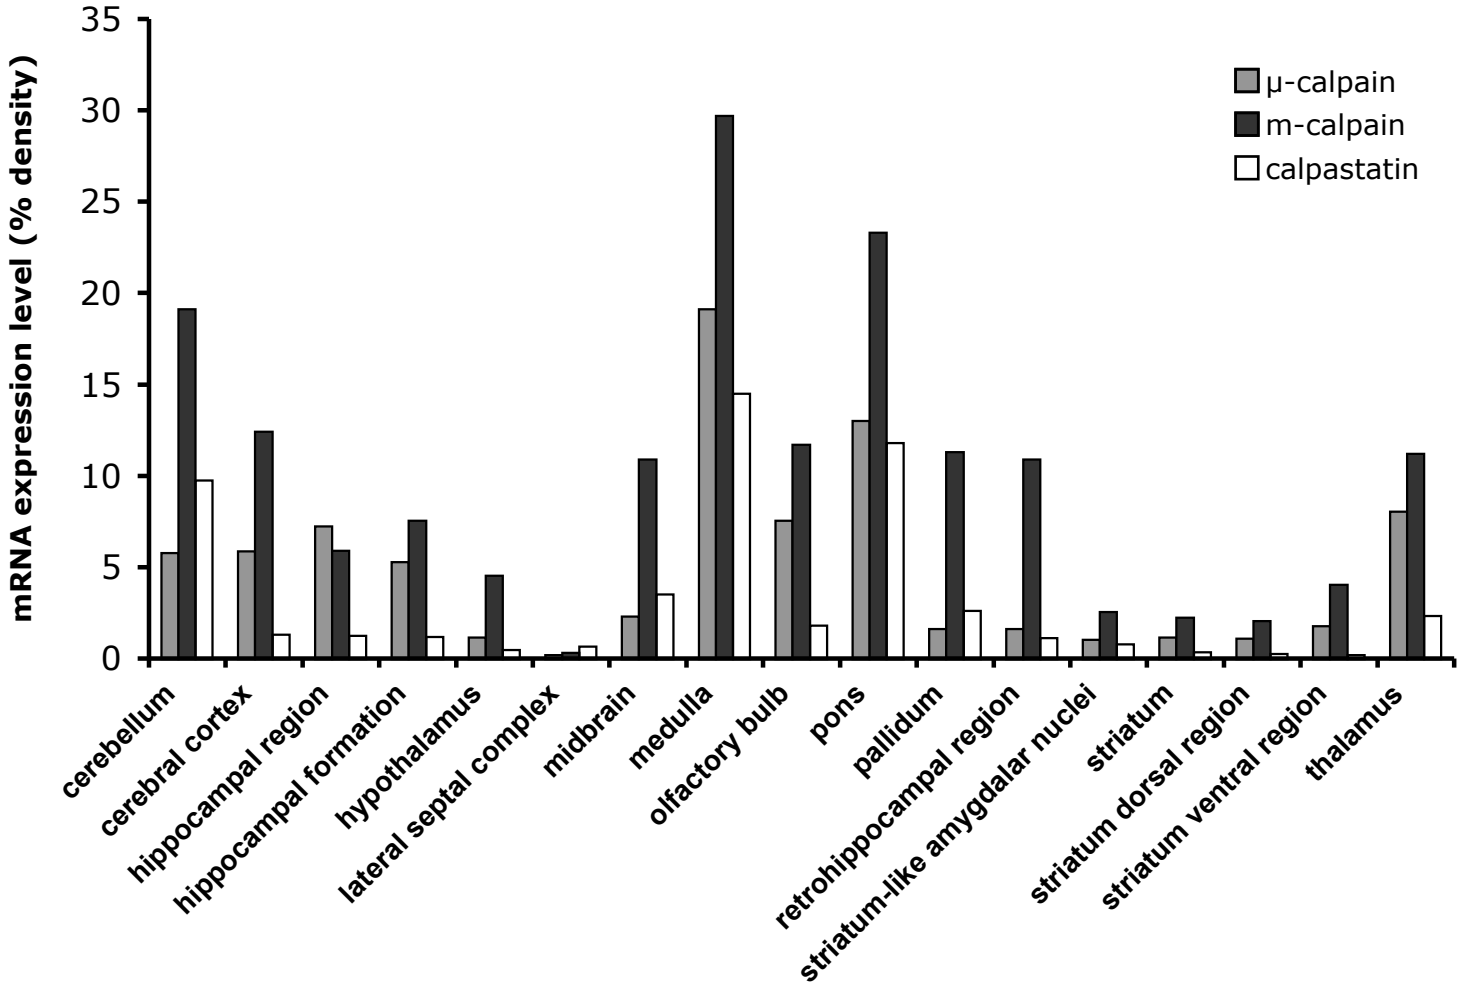

Supplement: Additional file 4 [file 1756-6606-1-7-s4.pdf]
